# Supplementary material for: Revisiting copper reduction in zeolites: the impact of autoreduction and sample synthesis procedure
Source: Royal Society of Chemistry journal article supplement (doi:10.1039/c8cc03921f), 2018-01-01
Supplement: c8cc03921f1.pdf [file c8cc03921f1.pdf]

Supporting Information for

## Revisiting Copper Reduction in Zeolites: The Impact of Auto-reduction and Sample Synthesis Procedure

Vitaly L. Sushkevich<sup>a,\*</sup>, Jeroen A. van Bokhoven<sup>a,b,\*</sup>

<sup>a</sup> *Laboratory for Catalysis and Sustainable Chemistry, Paul Scherrer Institut, 5232 Villigen PSI, Switzerland*

<sup>b</sup> *Institute for Chemistry and Bioengineering, ETH Zurich, Vladimir-Prelog-Weg 1, 8093 Zürich, Switzerland*

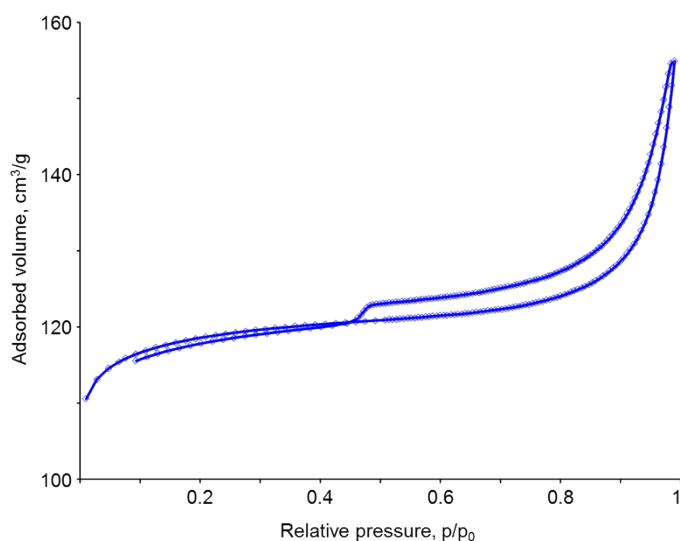

Fig. S1. Nitrogen adsorption-desorption isotherms obtained at 77K for CuMOR-C sample.

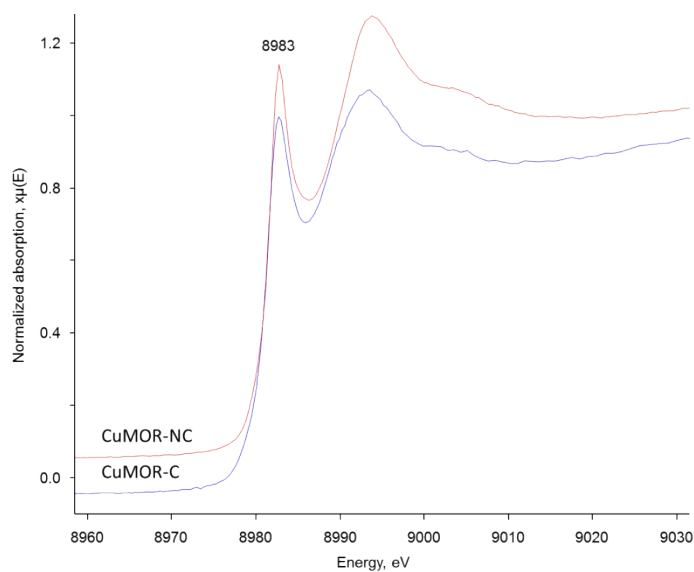

Fig. S2. Cu K-edge spectra of CuMOR-C and CuMOR-NC after reaction with methane at 700K. The offset was given for clarity.
